# Supplementary material for: Statistical Laws of Protein Motion in Neuronal Dendritic Trees
Source: PubMed Central journal article supplement — Cell Rep. 2020 Nov 17;33(7):108391. doi: 10.1016/j.celrep.2020.108391 (PMC7672524; doi:10.1016/j.celrep.2020.108391), 2020-11-17
Supplement: mmc1.pdf [file mmc1.pdf]

**Cell Reports, Volume 33**

**Supplemental Information**

**Statistical Laws of Protein Motion**

**in Neuronal Dendritic Trees**

**Fabio Sartori, Anne-Sophie Hafner, Ali Karimi, Andreas Nold, Yombe Fonkeu, Erin M. Schuman, and Tatjana Tchumatchenko**

## Supplemental Figures

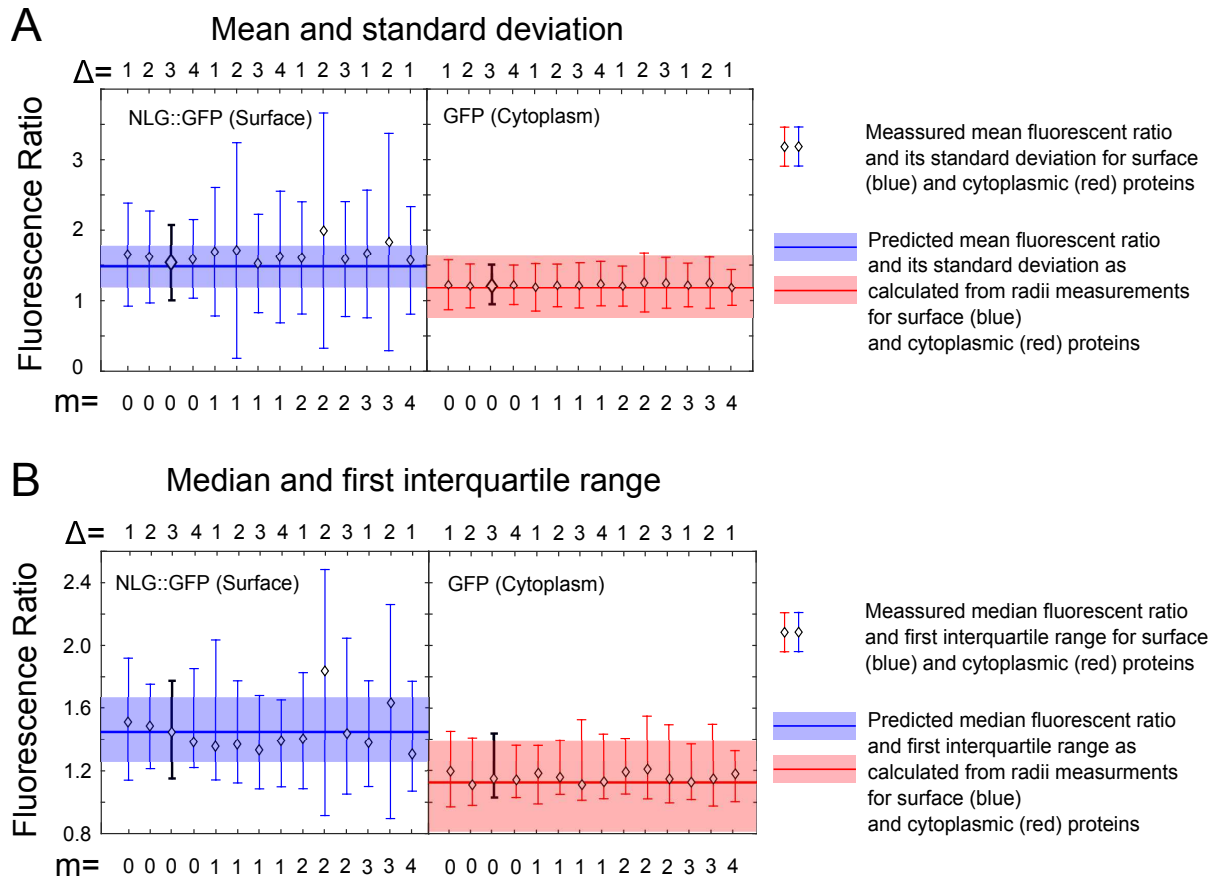

Figure S1: Supplemental data analysis related to Fig. 4 D. Two alternative calculations of error bars and averages associated with fluorescent signals and dendritic radii for surface and cytoplasmic proteins. (A) The error bar and center of each data point is calculated using the mean and standard deviation for GFP (cytoplasmic) and Nlg::GFP (surface) proteins, hereby  $Q_F^S$  (1.66, std= 0.99) and  $Q_F^C$  (1.26, std= 0.39). The predicted means and standard deviations of  $Q_P^S$  (1.48, std= 0.28) and  $Q_P^C$  (1.17, std= 0.43) that are calculated from dendritic radii ratios at branch points are shown as blue and red boxes. (B) The error bar and center of each data point is calculated using the median and interquartile range, hereby  $Q_F^S$  (1.41, IQR 1.1, 1.9) and  $Q_F^C$  (1.18, IQR 1.01, 1.44). The predicted medians and interquartile intervals of  $Q_P^S$  (1.45, IQR 1.27, 1.65) and  $Q_P^C$  (1.12, IQR 0.84, 1.38) that are calculated from dendritic radii ratios at branch points are shown as blue and red boxes.

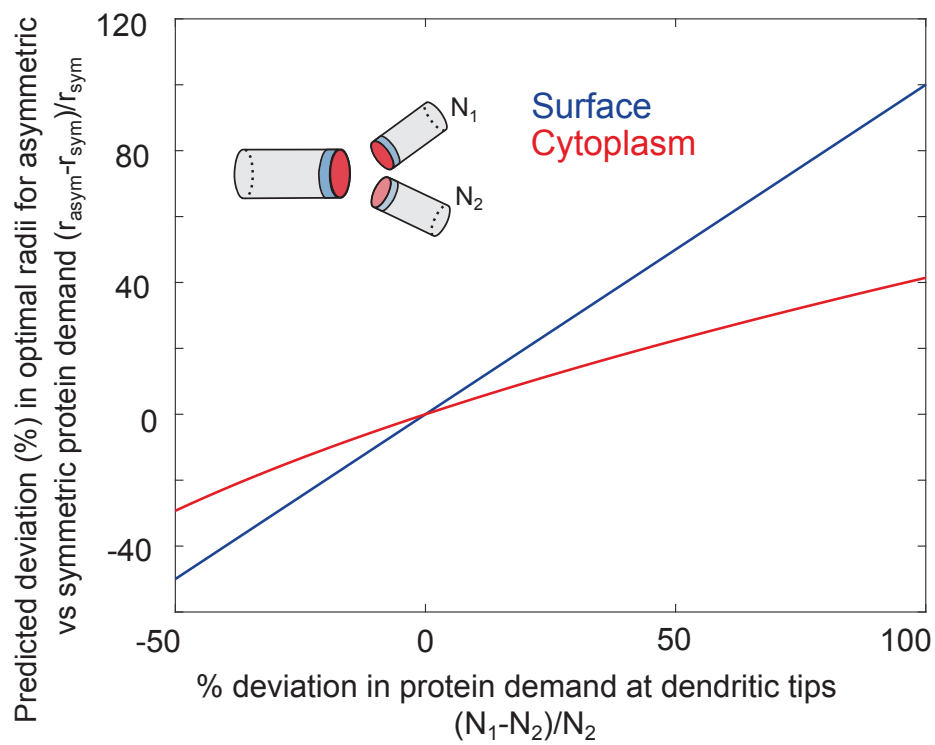

Figure S2: Supplemental analysis related to Fig. 5. Asymmetric protein demand and the associated optimal daughter radii. Synaptic plasticity can introduce asymmetric long-term protein demand downstream of a branch point ( $N_1$  vs  $N_2$ ). Here, we show how daughter radii that are optimal for the symmetric protein demand (shown in Fig. 5) deviate from those optimized for the asymmetric protein demand at the dendritic tips. Parameter choices as in Fig. 5.

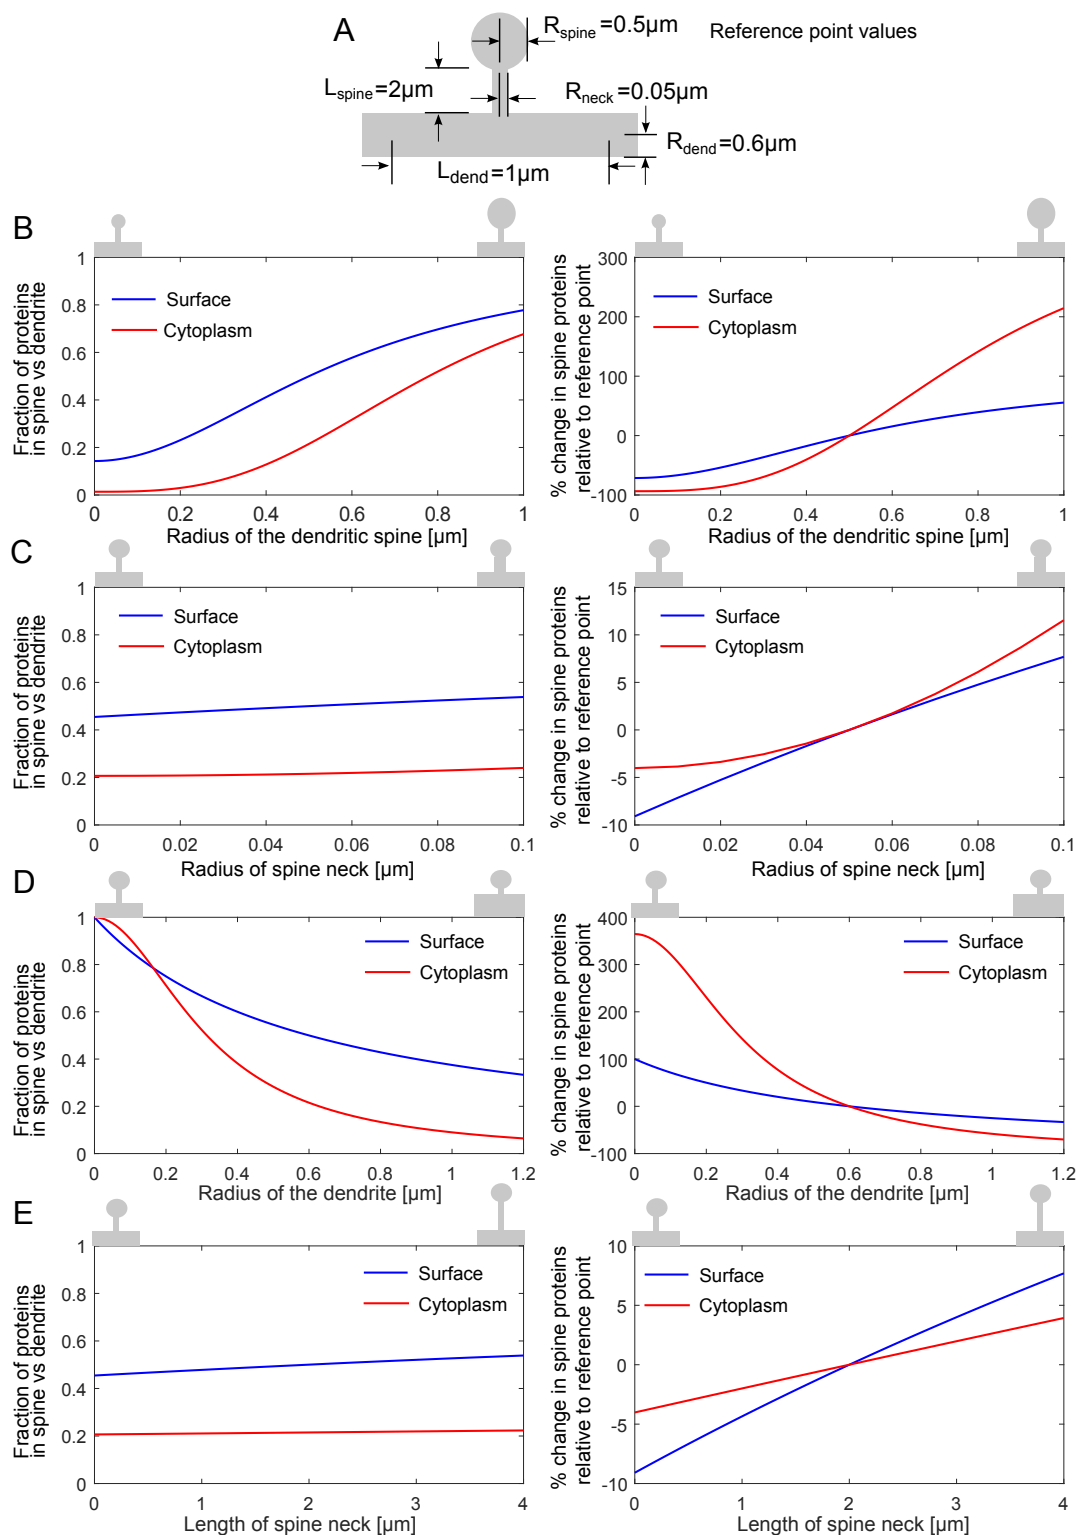

Figure S3: Supplemental figure related to Fig. 5. How does spine geometry shape the protein number in spines? To answer this question we assumed a constant protein density across the spine and dendrite and applied our branching calculations. (A) Spine geometry and default values used to exemplify the distribution of proteins in the spine and the local dendritic segment. Starting from this setting we varied each variable individually to investigate how it impacts the protein number in the spine. (B) Varying the radius of the spine head leads to a proportional increase in protein number. (C) Varying the radius of the spine neck has only a weak influence on the protein number in a spine (D) Increasing the radius of the dendrite carrying the spine reduces the number of proteins in the spine. (E) Increasing the length of the spine neck does not significantly alter the protein number in the spine. On the left column we reported the absolute values of the fraction of proteins in spine, while on the right column we show the percentage variation of the fraction of protein in spines.

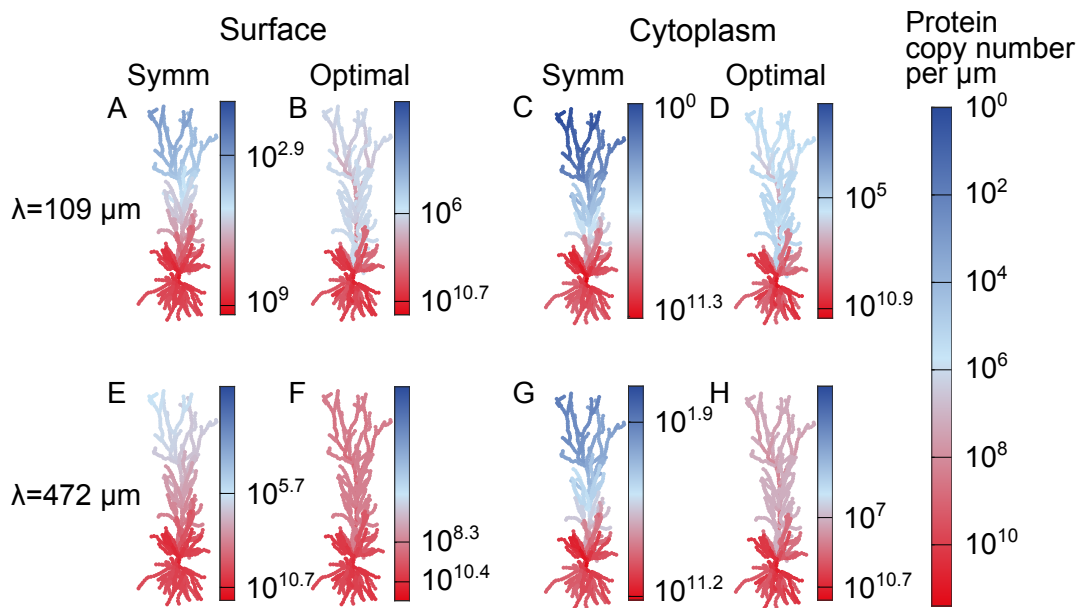

Figure S4: Supplemental analysis related to Fig. 6 C,D. Here, we show the predicted number of proteins per micrometer in a pyramidal neuron for different diffusion lengths for symmetrical and optimized branching radii for a protein with a different diffusion length  $\lambda = 109\mu\text{m}$  (top), this diffusion length corresponds to the median of the optimal diffusion lengths inferred from EM (Fig. 5C, blue). As in Fig. 6 C,D the color code represents the predicted number of proteins per  $\mu\text{m}$ . We confirm that the number of proteins in the distal parts is larger for surface proteins than for cytoplasmic proteins with this diffusion length. As in Fig. 6, we considered symmetrical daughter branches where the radius of a daughter dendrite is  $R_1 = R_2 = 0.75R_0$  and optimized daughter radii. In the bottom panels we show the distributions from Fig. C, D for comparison. Since we choose in the top panel a diffusion length that is smaller than that in Fig. 6 C,D the number of proteins that reach the dendritic tips is smaller than than in Fig. 6 C,D. To make sure that each compartment has at least one protein in the top and bottom panels we increase the number of proteins  $2 \cdot 10^{11}$  in all panels of this figure to enable a quantitative comparison. The black horizontal lines on the color bars indicate the minimal and the maximal protein concentration in the respective figures.

## Supplemental Table

| $\lambda$<br>( $\mu\text{m}$ ) | Protein Name                                                  | $\tau_{1/2}$<br>(days) | DOI                                        | $D$<br>( $\mu\text{m}^2/\text{s}$ ) | DOI                                    | Method        |
|--------------------------------|---------------------------------------------------------------|------------------------|--------------------------------------------|-------------------------------------|----------------------------------------|---------------|
| 686.9                          | Peroxiredoxin<br>(half-life -3,<br>diffusion -4)              | 7.3                    | 10.7554/eLife.34202                        | 0.52                                | 10.1016/j.redox.<br>2017.01.003        | SER           |
| 450.7                          | Plexin-A                                                      | 6.5                    | 10.7554/eLife.34202                        | 0.25                                | 10.1016/j.bnpj.2015.04.043             | FC            |
| 97.4                           | Grm5<br>(Metabotropic<br>glutamate re-<br>ceptor 5)           | 3.0                    | 10.7554/eLife.34202                        | 0.025                               | 10.1523/JNEUROSCI.22-<br>10-03910.2002 | SPT           |
| 314.3                          | CamKII                                                        | 7.2                    | 10.7554/eLife.34202                        | 0.111                               | 10.1523/JNEUROSCI.4364-<br>13.2014     | SPT           |
| 75.5                           | Synaptophysin                                                 | 9.2                    | 10.7554/eLife.34202                        | 0.005                               | 10.3389/fnmol.2014.00091               | FC            |
| 312.6                          | L1CAM (Neural<br>cell adhesion<br>molecule L1)                | 7.1                    | 10.7554/eLife.34202                        | 0.11                                | 10.1083/jcb.200211011                  | SPT           |
| 104.2                          | Clathrin-L (b<br>for half-life, c<br>for Diffusion<br>coeff.) | 9.1                    | 10.7554/eLife.34202                        | 0.0096                              | 10.3389/fnmol.2014.00091               | FC            |
| 111.6                          | GluA1-AMPA                                                    | 2.0                    | 10.1016/S0028<br>-3908(98)00135-X          | 0.005                               | 10.1093/brain/aws092                   | SPT           |
| 472.3                          | GABAAR sub-<br>unit alpha 2                                   | 5.0                    | 10.7554/eLife.34202                        | 0.36                                | 10.1093/brain/aws092                   | SPT           |
| 78.2                           | potassium chan-<br>nel Kv1.3                                  | 0.2                    | 10.1016/j.neuroscien<br>ce.2006.09.055     | 0.31                                | 10.1093/brain/aws092                   | SPT           |
| 891.1                          | Syt7 (Synapto-<br>tagmin 7)                                   | 7.0                    | 10.7554/eLife.34202                        | 0.91                                | 10.1021/bi5012223                      | SPT           |
| 73.4                           | Neurexin                                                      | 3.6                    | 10.7554/eLife.34202                        | 0.012                               | 10.1523/JNEUROSCI.4041-<br>14.2015     | SPT           |
| 168.3                          | AChE (acetyl-<br>cholinesterase)                              | 2.8                    | 10.1111/j.1471-<br>4159.<br>1974.tb04319.x | 0.08                                | 10.1016/S0012-1606<br>(89)80051-X      | FRAP          |
| 344.6                          | VAMP2-<br>pHluorin                                            | 6.8                    | 10.7554/eLife.34202                        | 0.14                                | 10.1083/jcb.201604001                  | SPT           |
| 3360.5                         | Calbindin                                                     | 4.5                    | 10.7554/eLife.34202                        | 20                                  | 10.1073/pnas.0407855102                | FRAP          |
| 2137.6                         | GAP43(S41A)<br>(Neuromodulin)                                 | 17.5                   | 10.7554/eLife.34202                        | 2.09                                | 10.1091/mbc.e13-12-0737                | FC            |
| 6162.8                         | Microtubule-<br>Associated<br>Protein Tau                     | 101.6                  | 10.7554/eLife.34202                        | 3                                   | 10.1523/JNEUROSCI.0927-<br>07.2007     | FRAP          |
| 986.7                          | Phosphatidyl<br>serine                                        | 22.0                   | 10.1042/bj1600195                          | 0.355                               | 10.1091/mbc.e11-11-0936                | FRAP<br>& SPT |
| 204                            | Actin                                                         | 8.4                    | 10.7554/eLife.34202                        | 0.04                                | 10.1073/pnas.1504762112                | FRAP          |
| 4256.1                         | Rho-associated<br>protein kinase 2                            | 5.6                    | 10.7554/eLife.34202                        | 26                                  | 10.1038/ncomms10029                    | FC            |
| 103.1                          | GABA-A sub-<br>unit $\alpha$ 1                                | 3.9                    | 10.7554/eLife.34202                        | 0.022                               | 10.3389/fncel.2014.00151               | SPT           |
| 302.4                          | GABA-A sub-<br>unit $\alpha$ 5                                | 7.6                    | 10.7554/eLife.34202                        | 0.097                               | 10.1038/ncomms7872                     | SPT           |
| 15                             | GluN2B                                                        | 3.4                    | 10.7554/eLife.34202                        | 0.00053                             | 10.1016/j.cell.2012.06.029             | SPT           |
| 2110.7                         | Phosphoinositide<br>phospholipase C                           | 8.5                    | 10.7554/eLife.34202                        | 4.2                                 | 10.1101/521369                         | FC            |

| $\lambda$<br>( $\mu m$ ) | Protein Name                          | $\tau_{1/2}$<br>(days) | DOI                 | $D$<br>( $\mu m^2/s$ ) | DOI                        | Method |
|--------------------------|---------------------------------------|------------------------|---------------------|------------------------|----------------------------|--------|
| 3709.6                   | Glutamine synthetase                  | 3.5                    | 10.7554/eLife.34202 | 32                     | 10.1023/A:1020574003027    | QELS   |
| 582.7                    | Vesicle-associated membrane protein 2 | 6.8                    | 10.7554/eLife.34202 | 0.4                    | 10.1016/j.cell.2009.01.016 | SPT    |

Table S1: Supplemental statistics of protein diffusion lengths related to Fig. 5. The first column of the table contains the protein diffusion length, the second column contains the name of the protein, the third and fourth contain the half life and the doi of the corresponding source. The fifth and sixth column contain the diffusion coefficient and the doi of the corresponding source. The last column is the technique used to measure the diffusion coefficient. SER stands for Stokes-Einstein Relationship, FC stands for Fluorescence Correlation, SPT stands for Single Particle Tracing and QELS for Quasi-elastic light scattering.
